# Supplementary material for: Functional reduced graphene oxide-based membranes with selective ion transport channels for zwitterionic ions separation based on the pH gradient
Source: Royal Society of Chemistry journal article supplement (doi:10.1039/c7nr07081k), 2017-12-04
Supplement: c7nr07081k1.pdf [file c7nr07081k1.pdf]

## Supporting information

### **Functional reduced graphene oxide–based membranes with selective ions transport channels for zwitterionic separation based on pH gradient**

Yu Wu<sup>a</sup>, Hongyun Ji<sup>a</sup>, Feng Yang<sup>b</sup>, Yan Meng<sup>a</sup>, Yujue Wang<sup>c</sup>, Jianyuan Dai<sup>b</sup>,

Haisheng Ren<sup>a</sup>, Guangqun Tan<sup>a\*</sup>, Dan Xiao<sup>abc\*</sup>

<sup>a</sup> College of Chemical Engineering, Sichuan University, Chengdu 610065, PR China

<sup>b</sup> College of Chemistry, Sichuan University, Chengdu 610064, PR China

<sup>c</sup> Institute of New Energy and Low–Carbon Technology, Sichuan University,

Chengdu 610207, PR China

E–mail: [tanguangqun@scu.edu.cn](mailto:tanguangqun@scu.edu.cn)    [xiaodan@scu.edu.cn](mailto:xiaodan@scu.edu.cn)

#### **Experimental section**

##### **Reagents**

Sulfuric acid (98.0%), potassium permanganate (99.5%), hydrochloric acid (36%), nitric acid (68%), sodium dihydrogen phosphate (99.0%), disodium hydrogen phosphate (99.0%), Potassium peroxydisulfate (99.5%), hydroquinol (98.0%) and phosphorus oxide (99.0%) were purchased from Chengdu Kelong Chemical Reagent Company). Hydrogen peroxide (30%) was purchased from ChongQing Maoye Chemical Reagent Co., Ltd. Fluorescein isothiocyanate (95.0%) was purchased from Sigma–Aldrich Co. LLC), Eosin Y was purchased from Aladdin Industrial Corporation.

##### **Preparation of graphene oxide (GO)**

Firstly, flake graphite powders were subjected to pre–oxidize. Graphite powders (4.0 g) were dispersed in H<sub>2</sub>SO<sub>4</sub> (98%, 16 mL) then K<sub>2</sub>S<sub>2</sub>O<sub>8</sub> (3.3642 g) and P<sub>2</sub>O<sub>5</sub> (3.3608 g) powders were added into the mixture consecutively. The mixture was allowed to react at 80°C for 4.5 h. The products were diluted and washed with amount of deionized water by filtration and obtained after overnight drying in the oven at 80°C. Secondly, the pre–oxidized products were re–oxidized by concentrated H<sub>2</sub>SO<sub>4</sub> and KMnO<sub>4</sub>.

28 Namely, the dried products were added into the beaker with  $\text{H}_2\text{SO}_4$  (98%, 92 mL) while  
 29 keeping the temperature at  $0^\circ\text{C}$ . Then  $\text{KMnO}_4$  (24.0240 g) was slowly added into the  
 30 mixture with magnetic stirring, overnight. The mixture was kept at  $35^\circ\text{C}$  for 2 h. Then,  
 31 deionized water (200 mL) was poured into the aforementioned beaker and went on  
 32 reacting for 2 h at  $35^\circ\text{C}$ . After that, deionized water (600 mL) and  $\text{H}_2\text{O}_2$  (30 mL) were  
 33 added, consecutively, and the mixture turned into yellow. The final product was washed  
 34 with  $1\text{ mol L}^{-1}$   $\text{HCl}$  to remove the remaining impurities. Finally, the products underwent  
 35 dialysis for several weeks. The graphene oxide solution was exfoliated into GO sheets  
 36 by ultrasonic in water for 2 h. The resulting brown dispersion ( $1\text{ mg mL}^{-1}$ ) was  
 37 centrifuged to remove unexfoliated GO and stored at room temperature for further use.  
 38

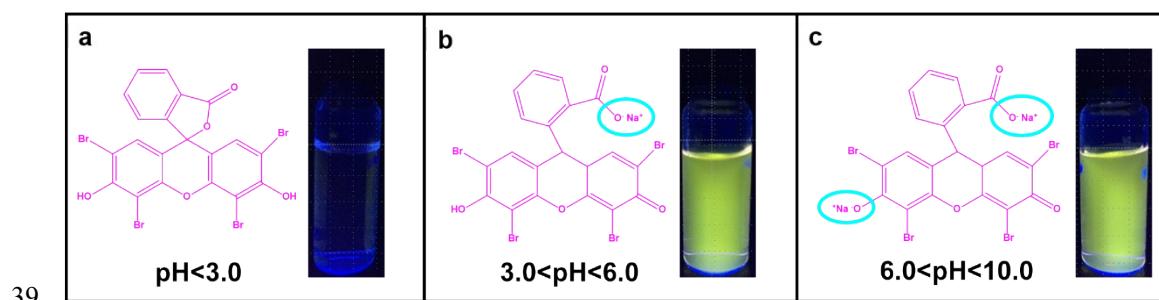

40 **Fig. S1** The photograph of Eosin Y solution under UV light (a: pH<3.0; b: 3.0<pH<6.0;  
 41 c: 6.0<pH<10.0) and the main formation of Eosin Y under different pH conditions.

42

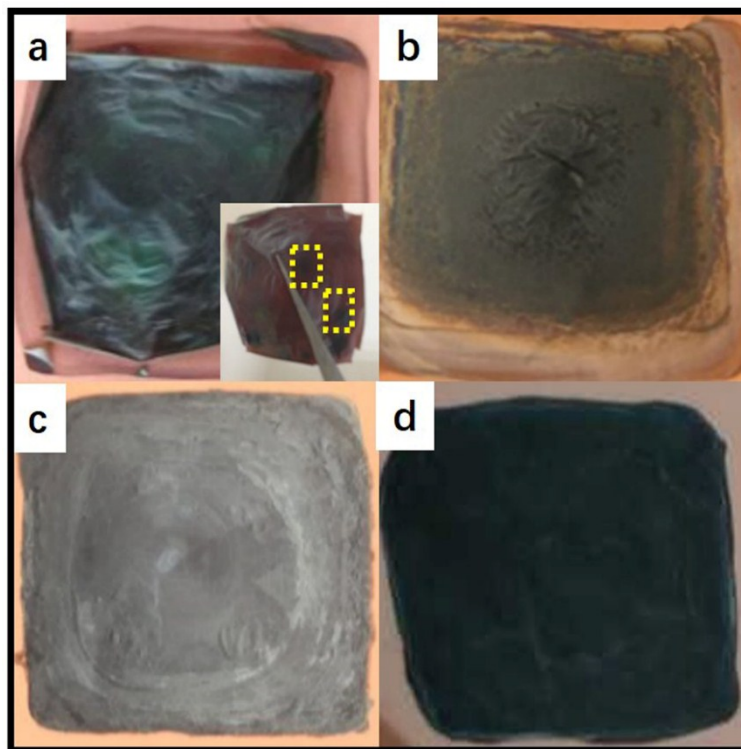

43

44 **Fig. S2** Photographs of different membranes on Cu foil. (a) GO@EY, (b) GO, (c)  
45 GO@HQ, and (d) FGM.

46 **The test of the molar fluxes:**

47 The molar fluxes were tested as follows: a series of graphene-based membranes were  
48 prepared with different GO@HQ/EY ratio, ranging from 20:1 to 20:4, which were  
49 named as FFGM1, FFGM2 and FFGM3. Isoleucine (Ile) and Glutamic acid (Glu) were  
50 applied as the research objects to evaluate the molar fluxes of these membranes. These  
51 membranes were equipped on the custom-built glass reservoirs with a steel holder. 20  
52 mL pH 3.22 buffer with 1 mmol L<sup>-1</sup> of Ile and Glu was used as the feed solution, and  
53 20 mL pH 6.02 buffer was applied as the receiver solution. The feed vessel was  
54 connected with anode, and the receiver vessel was connected with cathode. In the feed  
55 solution, Ile is positively charged and Glu is neutrally charged. Therefore, Ile will  
56 transport into receiver vessel, which connects with the cathode, and Glu will stay in the  
57 feed vessel in the electric field. Receiver samples were collected at a certain time  
58 interval (2 h), and capillary electrophoresis was used to accurate sample concentration.

59 The molar fluxes ( $J$ ) and selectivity ( $S$ ) of FFGM1, FFGM2 and FFGM3 were  
 60 calculated by the following equations (1) and (2), respectively.<sup>1, 2</sup>

$$61 \quad J = \frac{M}{A \times t} \quad (1)$$

$$62 \quad S = \frac{C_{A, receive}}{C_{A, feed}} \times \frac{C_{B, feed}}{C_{B, receive}} \quad (2)$$

63 Where  $A$  is the effective area,  $t$  is the operation time,  $M$  is the molar mass of the target  
 64 amino acid,  $C_{receiver}$  and  $C_{feed}$  are the concentration in receiver and feed vessels.  
 65

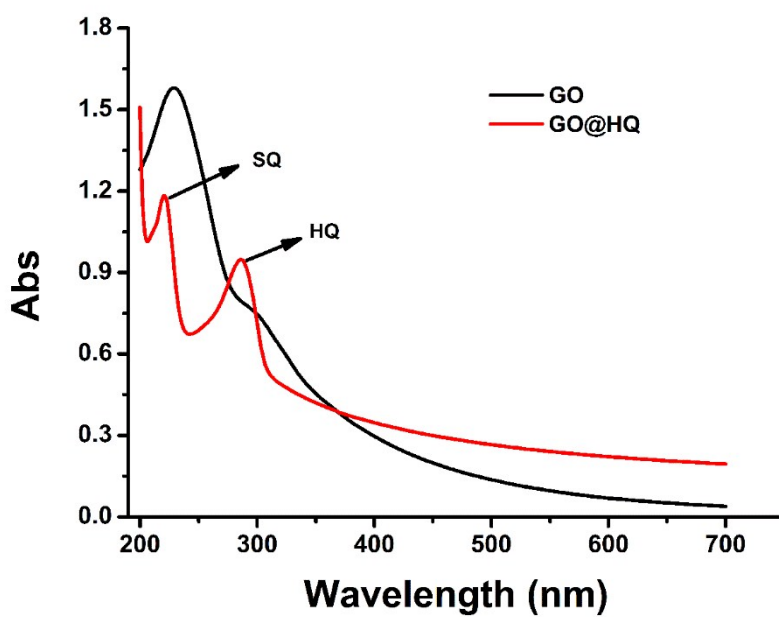

66  
 67 **Fig. S3** UV-vis spectra of GO and GO@HQ.

68  
 69  
 70

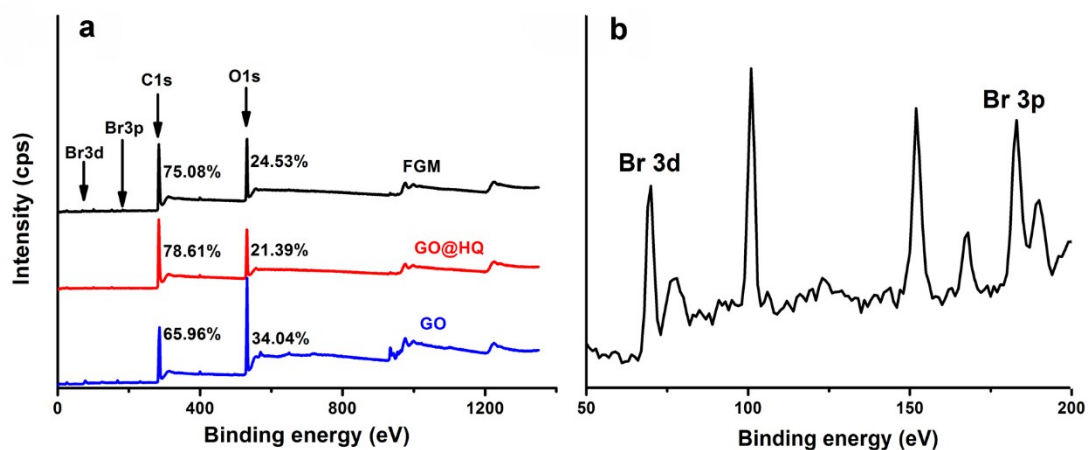

71  
 72 **Fig. S4** XPS spectra of the composite membranes. a is the survey spectra of GO,  
 73 GO@HQ and FFGM. b represents the Br3d and Br3p spectra.

74

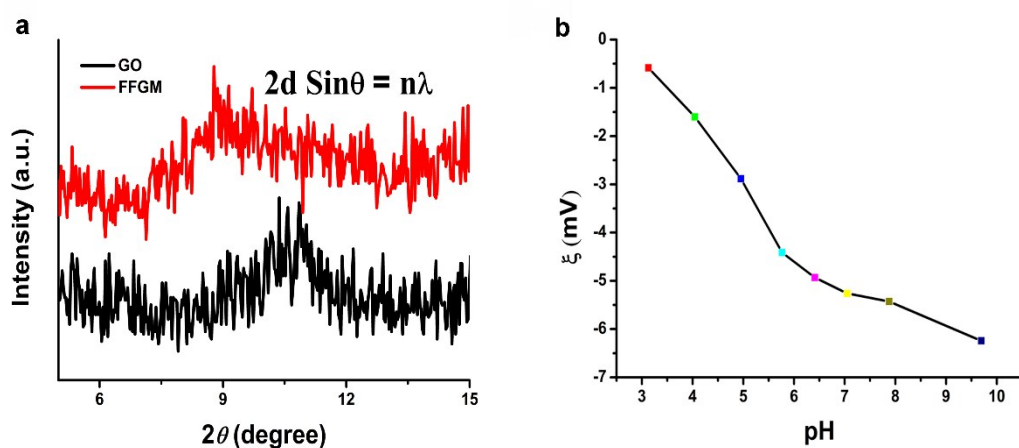

75  
 76 **Fig. S5** XRD spectra of GO and FFGM (a) and the zeta potential of FFGM under  
 77 different pH (b).

Glutamic acid (Glu)  
MW = 147.1 g/mol  
pI = 3.22  
pKa = 2.10  
pKb = 9.47

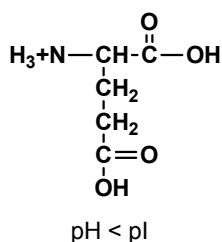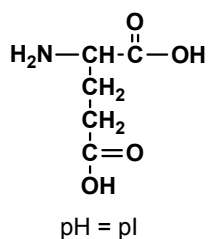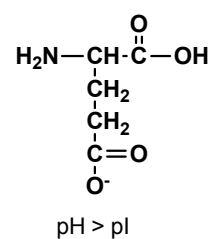

Isoleucine (Ile)  
MW = 131.2 g/mol  
pI = 6.02  
pKa = 2.32  
pKb = 9.76

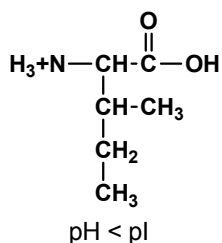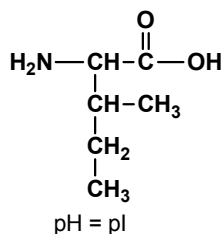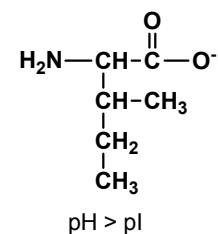

Phenylalanine (Phe)  
MW = 165.2 g/mol  
pI = 5.48  
pKa = 2.20  
pKb = 9.31

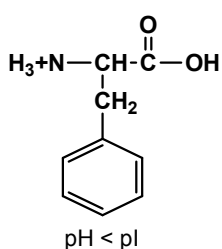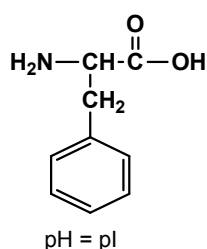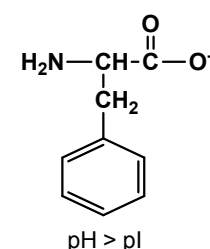

Histidine (His)  
MW = 155.0 g/mol  
pI = 7.59  
pKa = 1.80  
pKb = 6.04

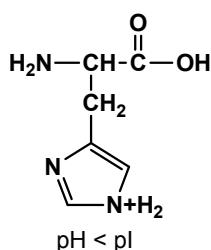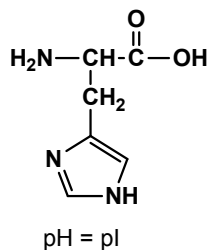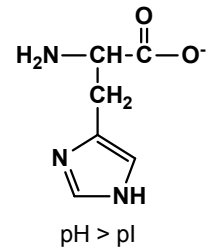

Threonine (Thr)  
MW = 119.2 g/mol  
pI = 6.53  
pKa = 2.09  
pKb = 9.10

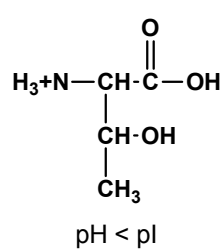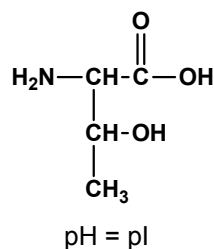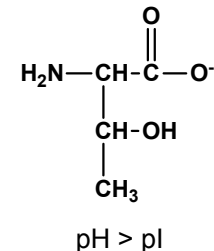

Sodium Fluorescein (SF)  
MW = 119.2 g/mol  
pKa = 6.4

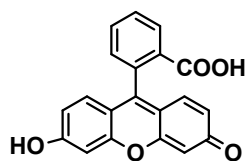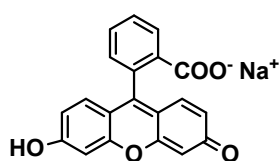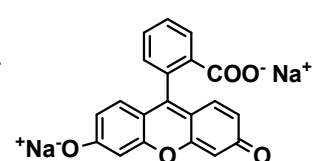

78

79

80 **Fig. S6 Structures of amino acids (AAs) and sodium fluorescein (SF).**

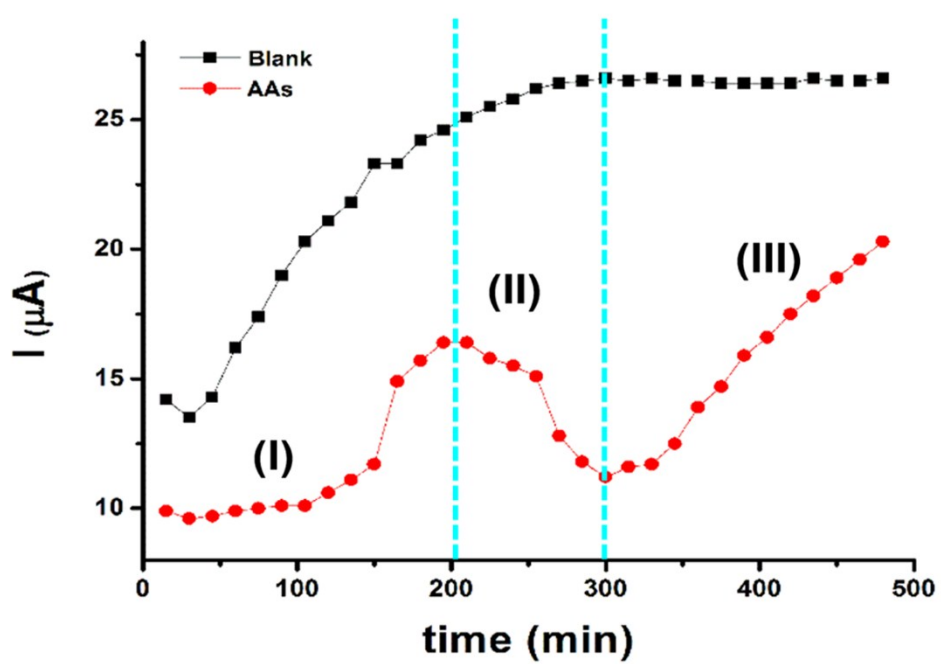

82

83 **Fig. S7** Current–time curve of blank system and amino acids system with FFGM.

84

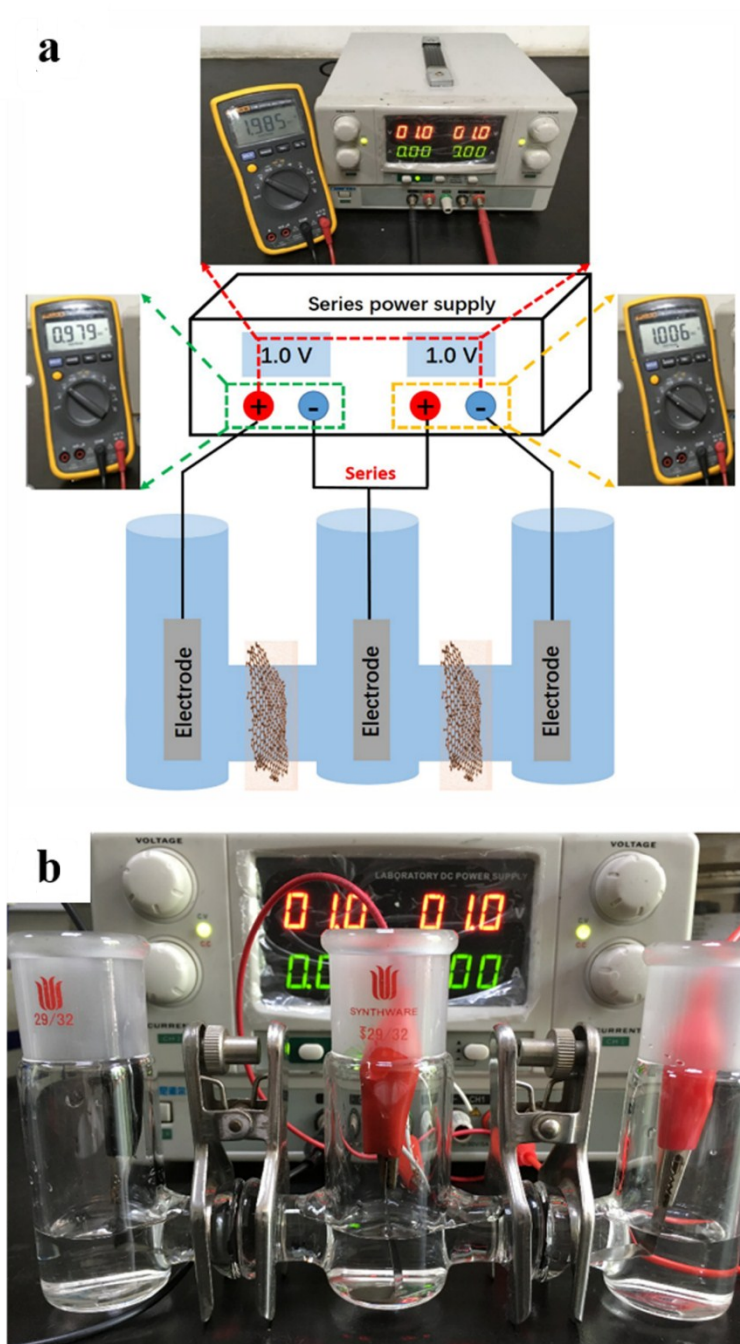

85

86 **Fig. S8** The schematic diagram and physical map of the series power supply (SPS). (a)  
 87 the schematic diagram of SPS, (b) the physical map of SPS.

88

89 As shown in **Fig. S8a**, a SPS with  $\pm 1.0$  V output voltage was divided into three parts,  
 90 as shown in green, yellow and red dashed box of **Fig. S8a**. **Fig. S8b** is the physical map  
 91 of the separation device and SPS.



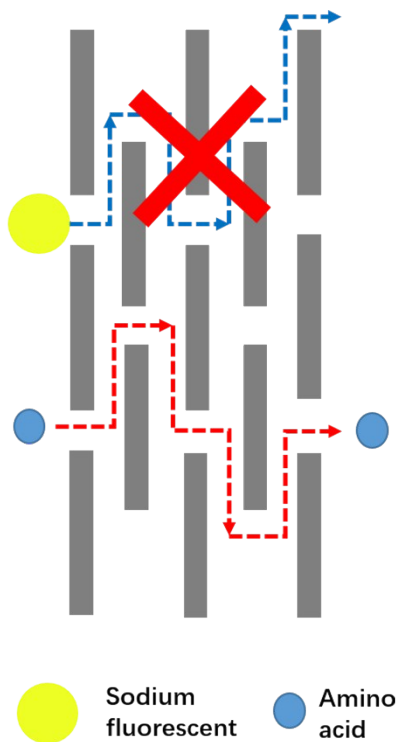

92

93 **Fig. S9** Schematic view for possible permeation route: amino acid transports through  
 94 the nanochannels of FFGM (red imaginary line) and sodium fluorescent is restricted  
 95 due to its large radius to the nanochannels of FFGM.

96

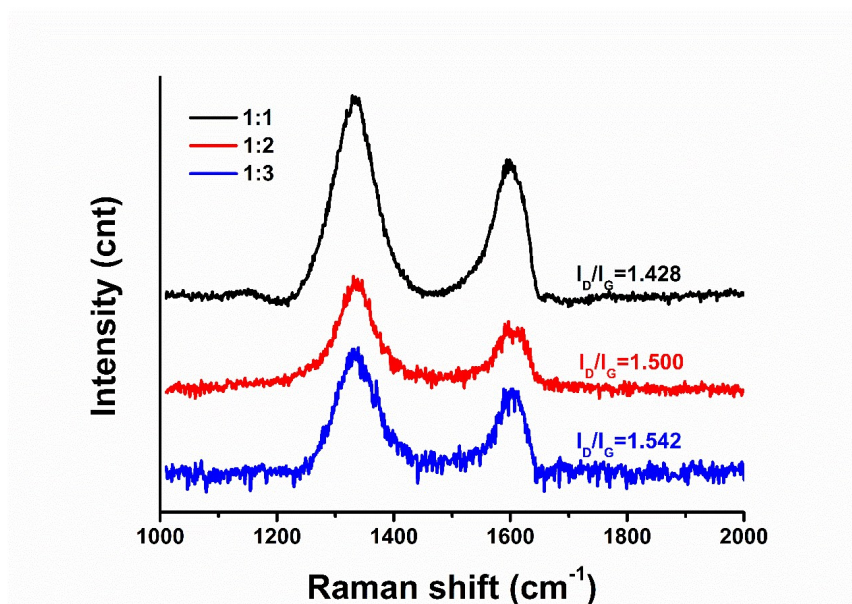

97

98 **Fig. S10** Raman spectra of FFGM with different reduction degree.

99

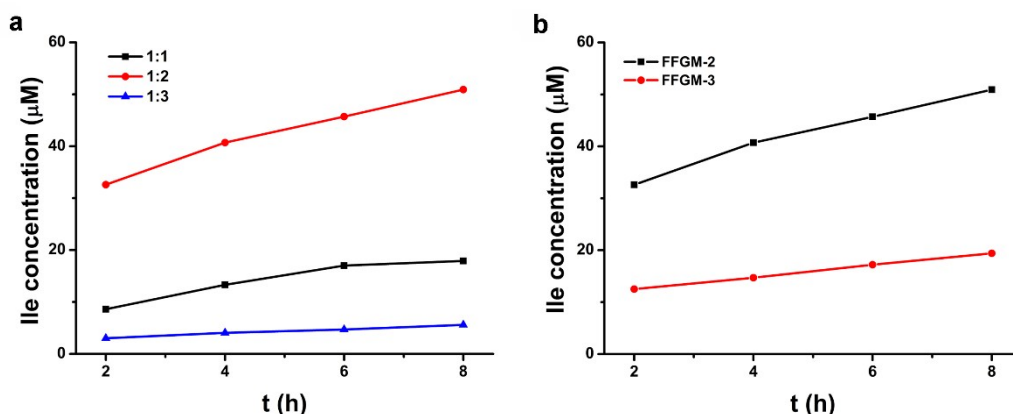

**Fig. S11** Concentration of Ile in receiver vessel via the FFGM with different reduction degree (a) and different thickness (b).

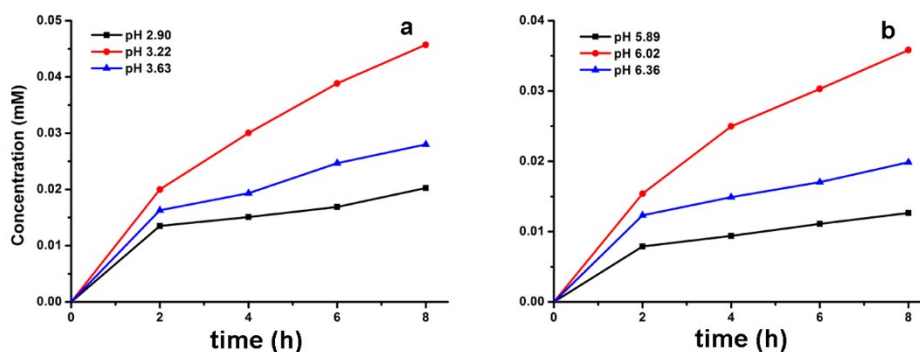

**Fig. S12** Separation results of different conditions: a and b represent the concentration of Glu and Ile in different pH receiver solution, respectively.

### The effect of different pH buffer on the separation performance.

In ternary amino acids mixture system, the different pH buffers were used as receiver solutions. Ile, Phe and Glu were taken as the research objects. Firstly, pH 5.48 and 6.02 buffer were fixed as (a) and (b') vessels solution (as shown in Fig. 4B), respectively. pH 2.90, 3.22 and 3.63 buffers were used as (b) vessel solution. As shown in Fig. S12a, in pH 3.22 receiver solution, the concentration of Glu is much higher than the other two pH. This is because of the different charge behavior of Glu in different pH solutions. When  $\text{pH} = \text{pI}_{\text{Glu}}$ , Glu was electroneutral and stayed in the anode solution. When  $\text{pH} \neq \text{pI}_{\text{Glu}}$ , Glu took positive or negative charge and migrated to the opposite electrodes. Secondly, pH 5.48 and 3.22 buffers were fixed as (a) and (b)

118 vessels solution, and pH 5.89, 6.02 and 6.36 buffers were used as the (b') vessel  
 119 solution. As shown in Fig. S12b, obviously, it has the same trend with Glu, when  
 120  $\text{pH}=\text{pI}_{\text{Ile}}$ , the concentration of Ile was the highest.

121

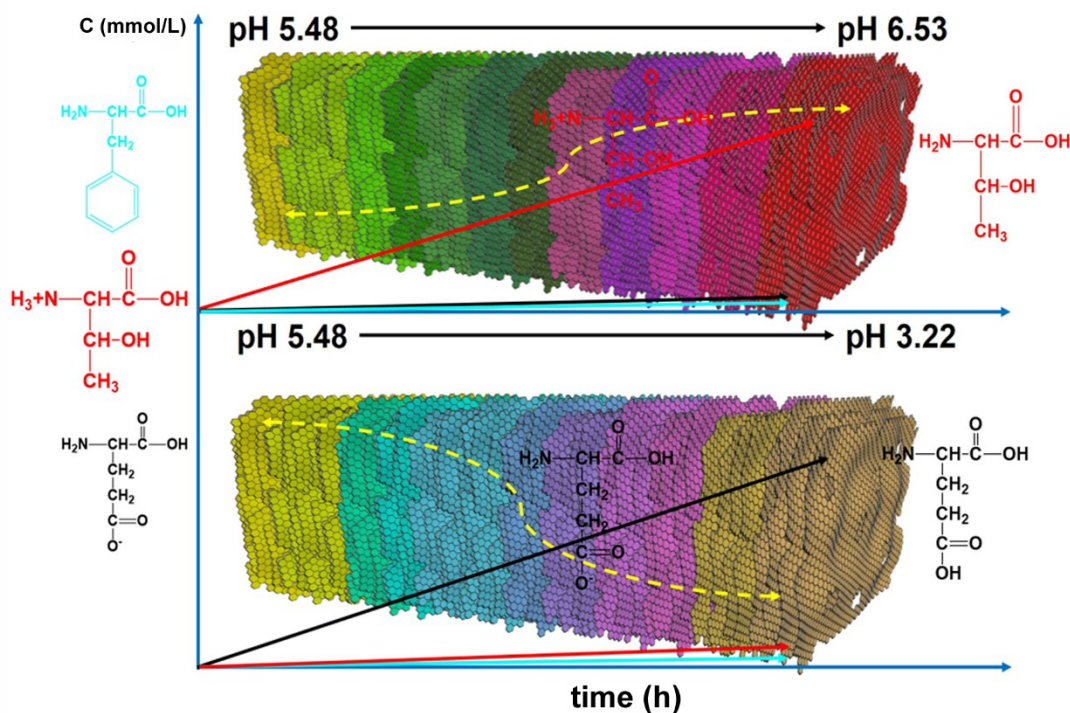

122

123 **Fig. S13** Separation process of Glu, Thr and Phe through FFGM (the yellow dashed  
 124 line represents the inner pH gradient in FFGM, the red, blue and black line represent  
 125 the concentration tendency of Thr, Phe and Glu in receiver vessel, respectively).

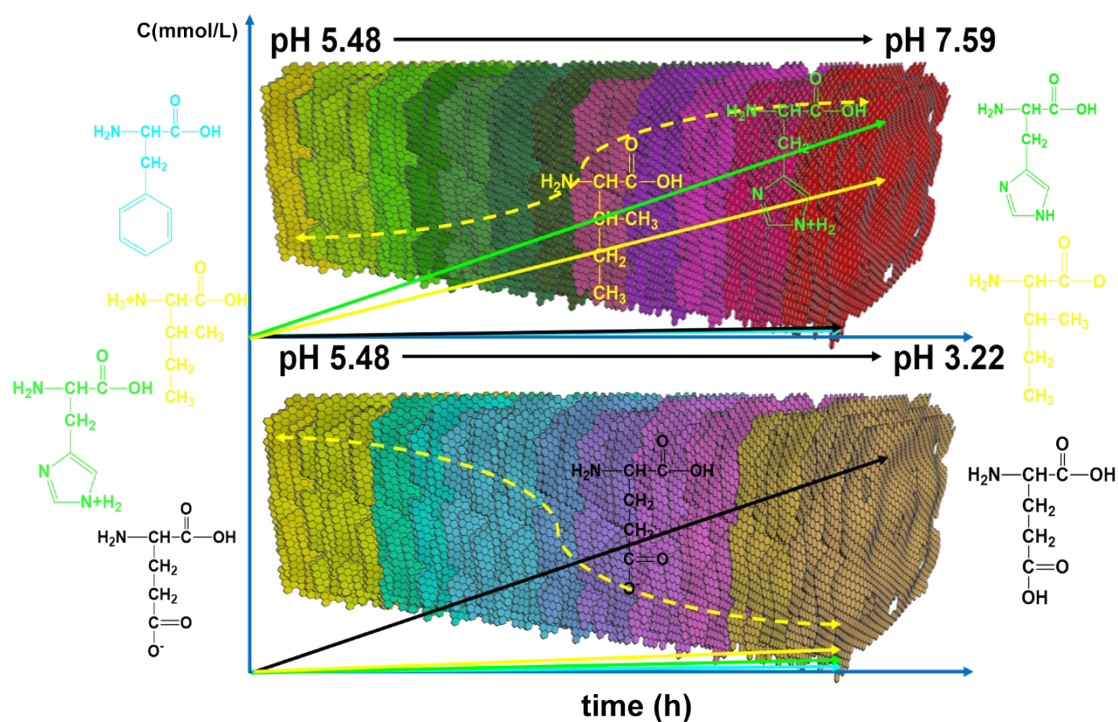

126

127 **Fig. S14** Separation process of Glu, Ile, His and Phe through FFGM (the yellow dashed  
 128 line represents the inner pH gradient in FFGM, the yellow, green, blue and black line  
 129 represent the concentration tendency of Ile, His, Phe and Glu in receiver vessel,  
 130 respectively).

131

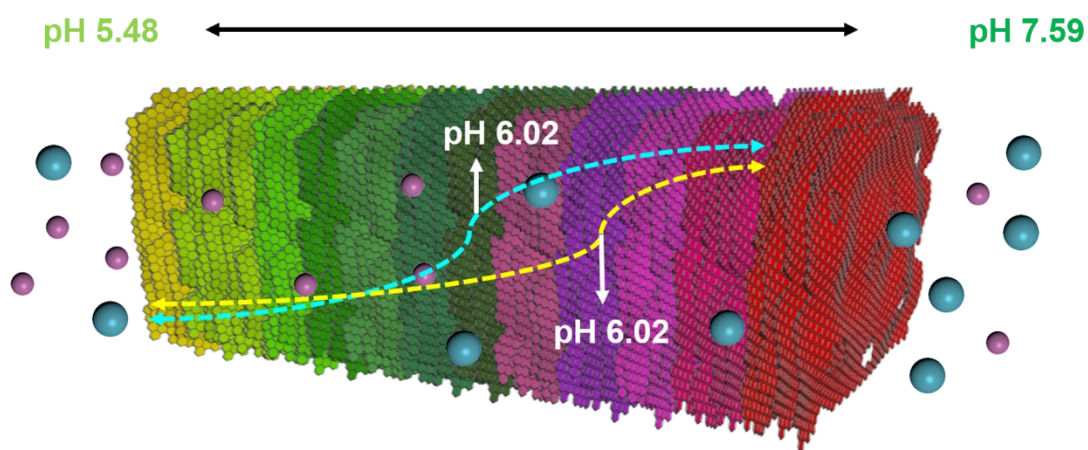

132

133 **Fig. S15** The pH gradient migrates in the FFGM over time.

134

135

136

137 **Reference**

- 138 1 S. Zinadini, A. A. Zinatizadeh, M. Rahimi, V. Vatanpour, H. Zangeneh, *J. Membr.*  
139 *Sci.*, 2014, **453**, 292.
- 140 2 S. U. Hong, M. L. Bruening, *J. Membr. Sci.*, 2006, **280**, 1.
